# Supplementary material for: Growth of Oyster (Crassostrea virginica) Larvae in Small‐Scale Systems Using an Algae Concentrate Food Source
Source: Hindawi journal article supplement (doi:10.1155/2024/1890826), 2024-01-01
Supplement: f1 [file 1890826.f1.pdf]

**Supplementary Table 1.** Average water parameters measured in controls and microcosms following water changes. Dissolved oxygen was only measured during trial 2. Bold *p Values* indicate significant differences among treatments, with pairwise comparison results denoted using superscripts. All data was analyzed using a Kruskal-Wallis test due to failure to meet normality.

|         | <b>Treatment</b>  | <b>Temperature<br/>(°C)</b> | <b>Salinity<br/>(ppt)</b> | <b>Dissolved Oxygen<br/>(mg L<sup>-1</sup>)</b> |
|---------|-------------------|-----------------------------|---------------------------|-------------------------------------------------|
| Trial 1 | Control           | 28.3 ± 0.58                 | 20.2 ± 1.60               | --                                              |
|         | 2-inch airlift    | 28.2 ± 0.64                 | 20.2 ± 1.60               | --                                              |
|         | 4-inch airlift    | 28.2 ± 0.59                 | 20.2 ± 1.63               | --                                              |
|         | 1 mL air injector | 28.1 ± 0.55                 | 20.1 ± 1.62               | --                                              |
|         | <i>p Value</i>    | 0.264                       | 0.369                     | --                                              |
| Trial 2 | Control           | 28.6 ± 0.64                 | 18.8 ± 1.87               | 6.29 ± 0.60 <sup>A</sup>                        |
|         | 1 mL air injector | 29.6 ± 0.73                 | 19.0 ± 2.08               | 6.59 ± 0.18 <sup>A</sup>                        |
|         | 5 mL air injector | 29.7 ± 0.62                 | 19.0 ± 2.08               | 6.57 ± 0.17 <sup>A</sup>                        |
|         | Zero aeration     | 29.7 ± 0.72                 | 19.0 ± 2.10               | 6.43 ± 0.23 <sup>A</sup>                        |
|         | <i>p Value</i>    | <b>0.025</b>                | 0.949                     | <b>0.012*</b>                                   |

\* Pairwise comparisons did not detect significant differences among treatments ( $p > 0.05$ ).
